# Supplementary material for: Combination of palmoplantar keratoderma and hair shaft anomalies, the warning signal of severe arrhythmogenic cardiomyopathy: a systematic review on genetic desmosomal diseases
Source: HighWire-hosted journal article supplement (doi:10.1136/jmedgenet-2015-103403), 2015-09-23
Supplement: jmedgenet-2015-103403supp_tables.pdf [file jmedgenet-2015-103403supp_tables.pdf]

**Table S1: Desmosomal disorders related to *JUP* mutation(s)**

| Disease                                        | Dermatological symptoms |                   |                |                            | Cardiac involvement | Mode of inheritance | Mutation              | Location | Total of patients | Total of families | Origin                         |
|------------------------------------------------|-------------------------|-------------------|----------------|----------------------------|---------------------|---------------------|-----------------------|----------|-------------------|-------------------|--------------------------------|
|                                                | PPK                     | Hair              | Skin fragility | Others ectodermal features |                     |                     |                       |          |                   |                   |                                |
| <b>Naxos syndrome</b>                          | +                       | woolly +/- sparse | -              | -                          | ARVC                | recessive           | c.2157del2            | Exon 14  | 74                | NA                | Greek / Turkish <sup>1-5</sup> |
| <b>CAPK syndrome</b>                           | +                       | atrachia          | -              | -                          | ARVC                | recessive           | c.794G>A/<br>p.R265H  | Exon 4   | 2                 | 1                 | Turkish <sup>6</sup>           |
| <b>Skin fragility + PPK + Woolly hair</b>      | +                       | woolly + sparse   | +              | -                          | no                  | recessive           | c.71C>A/<br>p.S24X    | Exon 2   | 3                 | 1                 | Argentina <sup>7</sup>         |
|                                                |                         |                   |                |                            |                     |                     | c.468G>A              | Exon 3   | 2                 | 1                 | Kuwaiti <sup>7</sup>           |
| <b>Lethal congenital epidermolysis bullosa</b> | -                       | alopecia          | +              | onycholysis                | no                  | recessive           | c.1615C>T/<br>p.Q539X | Exon 9   | 1                 | 1                 | German <sup>8</sup>            |

Sequences variations of *JUP* are referenced in the transcript GENE BANK accession NM\_002230.

**Table S2: Desmosomal disorders related to *DSP* mutation(s)**

| Disease                                      | Dermatological symptoms |                      |                |                            | Cardiac involvement | Mode of inheritance | Mutation                      | Location | Total of patients | Total of families | Origin                   |
|----------------------------------------------|-------------------------|----------------------|----------------|----------------------------|---------------------|---------------------|-------------------------------|----------|-------------------|-------------------|--------------------------|
|                                              | PPK                     | Hair                 | Skin fragility | Others ectodermal features |                     |                     |                               |          |                   |                   |                          |
| <b>Striate PPK</b>                           | +                       | -                    | -              | -                          | no                  | dominant            | c.939+1G>A                    | Intron 7 | 3                 | 1                 | NA <sup>9</sup>          |
|                                              |                         |                      |                |                            |                     |                     | c.C991T/p.Q331X*              | Exon 8   | 27                | 1                 | NA <sup>10</sup>         |
| <b>Autosomal dominant Carvajal Syndrome</b>  | +                       | woolly and/or sparse | -              | oligodontia                | yes                 | dominant            | c.1691C>T/p.T564I             | Exon 13  | 3                 | 2                 | NA <sup>11,12</sup>      |
|                                              |                         |                      |                | oligodontia                |                     |                     | 30bp insertion                | Exon 14  | 2                 | 1                 | NA <sup>13</sup>         |
|                                              |                         |                      |                | oligodontia                |                     |                     | c.1790C>T/p.S597L             | Exon 14  | 3                 | 1                 | NA <sup>14</sup>         |
|                                              |                         |                      |                | leuconychia                |                     |                     |                               |          |                   |                   |                          |
|                                              |                         |                      |                | nail dystrophy             |                     |                     | c.1748T>C/p.L583P             | Exon 14  | 1                 | 1                 | Caucasian <sup>12</sup>  |
| <b>Autosomal recessive Carvajal Syndrome</b> | +                       | woolly and/or sparse | -              | -                          | yes                 | recessive           | c.7901delG                    | Exon 24  | 12                | 3                 | Ecuadorian <sup>15</sup> |
|                                              |                         |                      |                |                            |                     |                     | c.3799C>T/p.R1267X            | Exon 23  | 1                 | 1                 | Turkish <sup>16</sup>    |
|                                              |                         |                      |                |                            |                     |                     | c.6166G>C/p.G2056R            | Exon 24  | 1                 | 1                 | Danish <sup>17</sup>     |
|                                              |                         |                      |                |                            |                     |                     | c.3901C>T/p.Q1301X            | Exon 23  | 1                 | 1                 | Indian <sup>18</sup>     |
|                                              |                         |                      |                |                            |                     |                     | c.5208_5209delAG/p.G1737TfsX7 | Exon 24  | 2                 | 1                 | NA <sup>19</sup>         |
|                                              |                         |                      |                |                            |                     |                     | c.7780delT/p.S2594PfsX8       | Exon 24  | 1                 | 1                 | Turkish <sup>20</sup>    |
|                                              |                         |                      |                |                            |                     |                     | c.7567delAAGA/p.K2523fsX37    | Exon 24  | 1                 | 1                 | NA <sup>21</sup>         |
| c.6577G>A/p.E2193K                           | Exon 24                 |                      |                |                            |                     |                     |                               |          |                   |                   |                          |

|                                                         |   |                            |   |   |     |           |  |                                         |                    |   |   |                           |
|---------------------------------------------------------|---|----------------------------|---|---|-----|-----------|--|-----------------------------------------|--------------------|---|---|---------------------------|
|                                                         |   |                            |   |   |     |           |  | c.7566_7567delAAins<br>C/ p.R2522SfsX39 | Exon 24            | 1 | 1 | NA <sup>22</sup>          |
|                                                         |   |                            |   |   |     |           |  | c.7756C>T/<br>p.R2586X                  | Exon 24            |   |   |                           |
|                                                         |   |                            |   |   |     |           |  | c.1067C>A/<br>p.T356K                   | Exon 9             | 2 | 1 | NA <sup>22</sup>          |
|                                                         |   |                            |   |   |     |           |  | c.2131_2132delAG/<br>p.S711CfsX4        | Exon 16            |   |   |                           |
|                                                         |   |                            |   |   |     |           |  | c.7123G>C/p.G2375R                      | Exon 24            | 9 | 1 | Israeli <sup>23</sup>     |
|                                                         |   |                            |   |   |     |           |  | c.3924delG/p.<br>H1309TfsX1348          | Exon 23            | 1 | 1 | Palestinian <sup>24</sup> |
|                                                         |   |                            |   |   |     |           |  | c.7111C>A, Q2371K                       | Exon 24            | 5 | 1 | Palestinian <sup>24</sup> |
| <b>Carvajal<br/>and skin<br/>fragility<br/>syndrome</b> | + | woolly<br>and/or<br>sparse | + | - | yes | recessive |  | c.4336C>T/p.Q1446X<br>c.2017C>T/p.Q673X | Exon 23<br>Exon 15 | 1 | 1 | UK <sup>25</sup>          |
|                                                         |   |                            |   |   |     |           |  | c.4778_4790del13/p.<br>L1593KfsX5       | Exon 23            | 1 | 1 | Swedish <sup>26</sup>     |
|                                                         |   |                            |   |   |     |           |  | c.6310delA/p.T2104<br>QfsX12            | Exon 24            |   |   |                           |
|                                                         |   |                            |   |   |     |           |  | c.4198C>T/R1400X<br>c.6850C>T/R2284X    | Exon 23<br>Exon 24 | 1 | 1 | Dominican <sup>27</sup>   |
|                                                         |   |                            |   |   |     |           |  | c.6310delA/<br>p.T2104QfsX12            | Exon 24            | 1 | 1 | Finnish <sup>28</sup>     |
|                                                         |   |                            |   |   |     |           |  | c.7964C>A/<br>p.A2655D                  | Exon 24            |   |   |                           |
|                                                         |   |                            |   |   |     |           |  | c.2516del4/p.H839fs<br>X23              | Exon 18            | 1 | 1 | Brazilian <sup>29</sup>   |
|                                                         |   |                            |   |   |     |           |  | c.3971del4/p.N1324f                     | Exon 23            |   |   |                           |

|                                                  |         |                      |   |                             |                                           |           | sX23                   |                    |   |   |                      |
|--------------------------------------------------|---------|----------------------|---|-----------------------------|-------------------------------------------|-----------|------------------------|--------------------|---|---|----------------------|
| <b>Skin fragility and woolly hair syndrome</b>   | +       | woolly and/or sparse | + | nail dystrophy              | no                                        | recessive | c.2427T>A/p.C809X      | Exon17             | 1 | 1 | NA <sup>30</sup>     |
|                                                  |         |                      |   |                             |                                           |           | c.861G>T/p.N287K       | Exon 7             |   |   |                      |
|                                                  |         |                      |   |                             |                                           |           | c.1990C>T/p.Q664X      | Exon 15            | 1 | 1 | NA <sup>30</sup>     |
|                                                  |         |                      |   |                             |                                           |           | c.7096C>T/p.R2366C     | Exon 24            |   |   |                      |
| c.7097G>A/p.R2366H                               | Exon 24 | 5                    | 1 | Saudi Arabian <sup>31</sup> |                                           |           |                        |                    |   |   |                      |
| c.7096C>T/p.R2366C                               | Exon 24 | 1                    | 1 | Caucasian <sup>32</sup>     |                                           |           |                        |                    |   |   |                      |
| c.6721_6722delAT/p.I2241FfsX3                    | Exon 24 |                      |   |                             |                                           |           |                        |                    |   |   |                      |
| <b>Lethal acantholytic epidermolysis bullosa</b> |         | alope-cia            | + | anonychia                   | poor cardiac contractility in one patient | recessive | c.5800C>T/p.R1934X**   | Exon 24<br>Exon 24 | 1 | 1 | Dutch <sup>33</sup>  |
|                                                  |         |                      |   |                             |                                           |           | c.6370delTT            |                    |   |   |                      |
|                                                  |         |                      |   |                             |                                           |           | c.2874del5/p.L959MfsX5 | Exon-Intron 20     | 2 | 1 | Yemeni <sup>34</sup> |
| c.7248delT/p.F2416LfsX14                         | Exon 24 | 1                    | 1 | NA <sup>35</sup>            |                                           |           |                        |                    |   |   |                      |

Sequences variations of *DSP* are referenced in the transcript GENE BANK accession NM\_004415.

c.C991T/p.Q331X\* : this mutation was published as c.C1323T/p.Q331X. The correspondence between c.C1323T and p.Q331X was not found in ENSEMBL software. Therefore, we renamed it with this new combination.

c.5800C>T/p.R1934X\*\* : This mutation was published as c.C6079T/p.R1934X . The correspondence between c.C6079T and p.R1934T was not found in ENSEMBL software. Therefore, we renamed it with this new combination.

**Table S3: McGrath Syndrome, *PKP1* identified mutations**

| Disease                                                                                                                                                                                            | Mode of inheritance | Mutation                 | Location                | Total of patients | Origin                  |
|----------------------------------------------------------------------------------------------------------------------------------------------------------------------------------------------------|---------------------|--------------------------|-------------------------|-------------------|-------------------------|
| : <b>Ectodermal Dysplasia/Skin fragility syndrome :</b><br>- PPK<br>- Skin fragility<br>- Perioral lesions (at least 11 patients)<br>- Sparse hair<br>- Nail dystrophy<br>- No cardiac involvement | recessive           | c.203-1G>A               | Intron 1                | 1                 | Caucasian <sup>36</sup> |
|                                                                                                                                                                                                    |                     | c.213T>G/p.Y71X          | Exon 2                  |                   |                         |
|                                                                                                                                                                                                    |                     | c.203-1G>A               | Intron 1                | 3                 | Arab <sup>37</sup>      |
|                                                                                                                                                                                                    |                     | c.203-1G>T               | Intron 1                | 2                 | Egyptian <sup>38</sup>  |
|                                                                                                                                                                                                    |                     | c.847-2A>G               | Intron 4                | 1                 | Arab <sup>37</sup>      |
|                                                                                                                                                                                                    |                     | c.888delC                | Exon 5                  | 2                 | Turkish <sup>39</sup>   |
|                                                                                                                                                                                                    |                     | c.897del5/p.P299fsX61    | Exon 5                  | 1                 | Iraqi <sup>40</sup>     |
|                                                                                                                                                                                                    |                     | c.910C>T/p.Q304X         | Exon 5                  | 1                 | British <sup>41</sup>   |
|                                                                                                                                                                                                    |                     | c.1132ins28/PTC          | Exon 6                  |                   |                         |
|                                                                                                                                                                                                    |                     | c.1054+1G>T              | Intron 5                | 1                 | Chinese <sup>42</sup>   |
|                                                                                                                                                                                                    |                     | c.1835-2A>G              | Intron 10               |                   |                         |
|                                                                                                                                                                                                    |                     | c.1233+2A>T              | Intron 6                | 1                 | French <sup>43</sup>    |
|                                                                                                                                                                                                    |                     | c.1233-2A>G/p.R411SfsX51 | Intron 6                | 1                 | Caucasian <sup>44</sup> |
| IVS9+1G>A                                                                                                                                                                                          | Intron 9            | 1                        | Dutch <sup>45</sup>     |                   |                         |
| c.2014C>T / p.R672X                                                                                                                                                                                | Exon 11             | 3                        | Brazilian <sup>29</sup> |                   |                         |
| c.2021+1G>A                                                                                                                                                                                        | Intron 11           | 1                        | Japanese <sup>46</sup>  |                   |                         |

Sequences variations of *PKP1* are referenced in the transcript GENE BANK accession NM\_001005337.

**Table S4: Desmosomal disorders related to *DSG1* and *DSG4* mutation(s)**

| Disease             | Gene                       | Mode of inheritance | Mutation          | Location  | Total of patients | Origin                              |
|---------------------|----------------------------|---------------------|-------------------|-----------|-------------------|-------------------------------------|
| <b>Isolated PPK</b> | <b><i>Desmoglein 1</i></b> | dominant            | IVS2-1G>A         | Intron 2  | 6                 | Dutch <sup>47</sup>                 |
|                     |                            |                     | c.76C>T/p.R26X    | Exon 2    | 11                | Yemenite/pakistani <sup>48-50</sup> |
|                     |                            |                     | c.121insT/PTC     | Exon 3    | 3                 | Libyan <sup>51</sup>                |
|                     |                            |                     | IVS4-2A>G         | Intron 4  | 11                | Pakistani <sup>50</sup>             |
|                     |                            |                     | c.395C>A/p.S132X  | Exon 5    | 3                 | Iranian-Syrian <sup>52</sup>        |
|                     |                            |                     | c.430A>T/p.R144X  | Exon 5    | 4                 | Scottish <sup>53</sup>              |
|                     |                            |                     | c.515C>T          | Exon 5    | 10                | Pakistani <sup>50</sup>             |
|                     |                            |                     | c.C602T/p.Q201X   | Exon 5    | 5                 | Jewish Sephardic <sup>54</sup>      |
|                     |                            |                     | c.C655T/p.R219X   | Exon 5    | 3                 | Jewish Ashkenazi <sup>54</sup>      |
|                     |                            |                     | c.1079insC/PTC    | Exon 9    | 1                 | NA <sup>48</sup>                    |
|                     |                            |                     | c.1095T>A/p.Y365X | Exon 9    | 1                 | NA <sup>48</sup>                    |
|                     |                            |                     | c.1189delA/PTC    | Exon 9    | 1                 | NA <sup>48</sup>                    |
|                     |                            |                     | IVS9-3C>G         | Intron 9  | 10                | Pakistani <sup>50</sup>             |
|                     |                            |                     | c.1399delA        | Exon 10   | 3                 | Pakistani <sup>50</sup>             |
|                     |                            |                     | c.1627delA/PTC    | Exon 11   | 1                 | NA <sup>48</sup>                    |
|                     |                            |                     | c.1668-1G>T       | Intron 11 | 11                | Pakistani <sup>55</sup>             |

|                                                                                                   |                     |           |                                        |                    |    |                                    |
|---------------------------------------------------------------------------------------------------|---------------------|-----------|----------------------------------------|--------------------|----|------------------------------------|
|                                                                                                   |                     |           | c.1931delA /PTC                        | Exon 14            | 2  | Jewish Ashkenazi <sup>54</sup>     |
| <b>SAM Syndrome :</b><br>- Severe Skin dermatitis,<br>- multiple Allergies<br>- Metabolic wasting | <i>Desmoglein 1</i> | recessive | c.49-1G>A, in-frame skipping of exon 2 | Exon 2             | 2  | Arab <sup>56</sup>                 |
|                                                                                                   |                     |           | c.1861delG/ p.A612Qfs.X3               | Exon 13            | 4  | Arab <sup>56</sup>                 |
|                                                                                                   |                     |           | c.2659C>T/p.R887X                      | Exon 15            | 1  | NA <sup>57</sup>                   |
| <b>Localized Autosomal recessive Hypotrichosis (LAH Syndrome)</b>                                 | <i>Desmoglein 4</i> | recessive | c.Ex5_8del                             | Exon 5 to 8        | 34 | Pakistani <sup>58-60</sup>         |
|                                                                                                   |                     |           | c.GG384-385TT/p.A129S                  | Exon 5             | 1  | Iraqi <sup>61</sup>                |
|                                                                                                   |                     |           | c.87delG/PTC                           | Exon 3             | 6  | Pakistani <sup>62</sup>            |
| <b>Monilethrix</b>                                                                                | <i>Desmoglein 4</i> | recessive | c.574T>C/p.S192P<br>c.2039insT/PTC     | Exon 6<br>Exon 13  | 1  | Japanese <sup>63</sup>             |
|                                                                                                   |                     |           | c.799C>G/ P267R                        | Exon 7             | 9  | Iraqi <sup>64</sup>                |
|                                                                                                   |                     |           | p.P267R<br>p.R289X                     | Exon 7<br>Exon 8   | 3  | Iraqi / Moroccan <sup>64</sup>     |
|                                                                                                   |                     |           | c.216+1G>T<br>p.P267R                  | Intron 3<br>Exon 7 | 6  | Iraqi and Iranian <sup>64,65</sup> |
|                                                                                                   |                     |           | c.763delT<br>c.216+1G>T                | Exon 7<br>Intron 3 | 2  | Iranian <sup>64</sup>              |
|                                                                                                   |                     |           | p.P267R<br>c.763delT                   | Exon 7<br>Exon 7   | 2  | Iraqi and Iranian <sup>64</sup>    |

|                                             |                   |   |                        |
|---------------------------------------------|-------------------|---|------------------------|
| c.624delG/p.M208IfsX4<br>c.2468G>A/ p.W823X | Exon 6<br>Exon 16 | 1 | Japanese <sup>66</sup> |
| c.2119delG/p.R707IfsX109                    | Exon 14           | 1 | Japanese <sup>67</sup> |

Sequences variations of *DSG1* and *DSG4* are referenced in the transcript GENE BANK accession NM\_001942 and NM\_177986 respectively.



**Table S5: Desmosomal genodermatoses induced by *DSC2* and *DSC3* mutation(s)**

| Disease                                                                        | Gene                 | Mode of inheritance | Mutation                    | Location | Total of patients | Origin               |
|--------------------------------------------------------------------------------|----------------------|---------------------|-----------------------------|----------|-------------------|----------------------|
| - <b>Woolly hair</b><br>- <b>Mild PPK</b><br>- <b>Left cardiac involvement</b> | <i>Desmocollin 2</i> | recessive           | c.1841delG/<br>p.S614fsX625 | Exon 12  | 2                 | NA <sup>68</sup>     |
| <b>Hypotrichosis</b>                                                           | <i>Desmocollin 3</i> | recessive           | c.2129T>G/p.L710X           | Exon 14  | 4                 | Afghan <sup>69</sup> |

Sequences variations of *DSC2* and *DSC3* are referenced in the transcript GENEBANK accession NM\_024422 and NM\_001941, respectively.

**Table S6: Desmosomal disorders related to *CDSN* mutation(s)**

| Disease                                         | Mode of inheritance | Mutation                                                                                                     | Location | Total of patients                         | Total of families | Origin                            |
|-------------------------------------------------|---------------------|--------------------------------------------------------------------------------------------------------------|----------|-------------------------------------------|-------------------|-----------------------------------|
| <b>Hypotrichosis Simplex of the Scalp (HSS)</b> | dominant            | p.Q215X                                                                                                      | Exon 2   | 26 (Israeli family) + 17 (spanish family) | 2                 | Spanish and Israeli <sup>70</sup> |
|                                                 |                     | p.Q200X                                                                                                      | Exon 2   | US                                        | 1                 | Danish <sup>70</sup>              |
|                                                 |                     | p.Y239X*                                                                                                     | Exon 2   | 42                                        | 1                 | Mexican <sup>71</sup>             |
|                                                 |                     | c.717C>G/p.Y239X*                                                                                            | Exon 2   | 3                                         | 1                 | Chinese <sup>72</sup>             |
| <b>Peeling Skin Syndrome type B (PSS)</b>       | recessive           | c.164_167dup GCCT/<br>p.T57PfsX6                                                                             | Exon 2   | 1                                         | 1                 | Ashkenazi Jewish <sup>73</sup>    |
|                                                 |                     | c.175A>T/p.K59X                                                                                              | Exon 2   | 4                                         | 1                 | German <sup>74</sup>              |
|                                                 |                     | c.424G>T/p.G142X                                                                                             | Exon 2   | 2                                         | 1                 | NA <sup>75</sup>                  |
|                                                 |                     | c.746delG/<br>p.G249VfsX40                                                                                   | Exon 2   | 2                                         | 1                 | NA <sup>76</sup>                  |
|                                                 |                     | A genomic deletion at the PSORS1 locus removing the entire <i>CDSN</i> gene                                  |          | 1                                         | 1                 | Japanese <sup>77</sup>            |
|                                                 |                     | A large homozygous deletion of 59,184bp extending from 40.6 kb upstream to 13.2 kb downstream of <i>CDSN</i> |          | 1                                         | 1                 | Japanese <sup>78</sup>            |

Sequences variations of *CDSN* are referenced in the transcript GENE BANK accession NM\_001264.

\* These two mutations seem to be the similar.

**Legend of the 6 supplemental tables :**

- = absent, + = present, NA = Not Available, ARVC = Arrhythmogenic Right Ventricular Cardiomyopathy, *CDSN* = Corneodesmosin gene, *DSC2* = Desmocollin 2 gene, *DSC3* = Desmocollin 3 gene, *DSG1* = Desmoglein 1 gene, *DSG4* = Desmoglein 4 gene, *DSP* = Desmoplakin gene, *JUP* = Plakoglobin gene, *PKP1* = Plakophilin 1 gene, PPK = Palmoplantar Keratoderma, PTC = Premature Termination Codon

## References :

1. McKoy, G. *et al.* Identification of a deletion in plakoglobin in arrhythmogenic right ventricular cardiomyopathy with palmoplantar keratoderma and woolly hair (Naxos disease). *Lancet* 355, 2119–2124 (2000).
2. Protonotarios, N. *et al.* Genotype-phenotype assessment in autosomal recessive arrhythmogenic right ventricular cardiomyopathy (Naxos disease) caused by a deletion in plakoglobin. *J. Am. Coll. Cardiol.* 38, 1477–1484 (2001).
3. Narin, N. *et al.* Arrhythmogenic right ventricular cardiomyopathy (Naxos disease): report of a Turkish boy. *Pacing Clin. Electrophysiol. PACE* 26, 2326–2329 (2003).
4. Antoniades, L. *et al.* Arrhythmogenic right ventricular cardiomyopathy caused by deletions in plakophilin-2 and plakoglobin (Naxos disease) in families from Greece and Cyprus: genotype-phenotype relations, diagnostic features and prognosis. *Eur. Heart J.* 27, 2208–2216 (2006).
5. Lazaros, G. *et al.* Naxos disease presenting with ventricular tachycardia and troponin elevation. *Heart Vessels* 24, 63–65 (2009).
6. Erken, H. *et al.* Cardiomyopathy with alopecia and palmoplantar keratoderma (CAPK) is caused by a JUP mutation. *Br. J. Dermatol.* 165, 917–921 (2011).
7. Cabral, R. M. *et al.* Homozygous mutations in the 5' region of the JUP gene result in cutaneous disease but normal heart development in children. *J. Invest. Dermatol.* 130, 1543–1550 (2010).
8. Pigors, M. *et al.* Lack of plakoglobin leads to lethal congenital epidermolysis bullosa: a novel clinico-genetic entity. *Hum. Mol. Genet.* 20, 1811–1819 (2011).
9. Whittock, N. V. *et al.* Striate palmoplantar keratoderma resulting from desmoplakin haploinsufficiency. *J. Invest. Dermatol.* 113, 940–946 (1999).

10. Armstrong, D. K. *et al.* Haploinsufficiency of desmoplakin causes a striate subtype of palmoplantar keratoderma. *Hum. Mol. Genet.* 8, 143–148 (1999).
11. Boulé, S. *et al.* Expanding the phenotype associated with a desmoplakin dominant mutation: Carvajal/Naxos syndrome associated with leukonychia and oligodontia. *Int. J. Cardiol.* 161, 50–52 (2012).
12. Keller, D. I. *et al.* De novo heterozygous desmoplakin mutations leading to Naxos-Carvajal disease. *Swiss Med. Wkly.* 142, w13670 (2012).
13. Norgett, E. E. *et al.* Early death from cardiomyopathy in a family with autosomal dominant striate palmoplantar keratoderma and woolly hair associated with a novel insertion mutation in desmoplakin. *J. Invest. Dermatol.* 126, 1651–1654 (2006).
14. Chalabreysse, L. *et al.* A new hypo/oligodontia syndrome: Carvajal/Naxos syndrome secondary to desmoplakin-dominant mutations. *J. Dent. Res.* 90, 58–64 (2011).
15. Norgett, E. E. *et al.* Recessive mutation in desmoplakin disrupts desmoplakin-intermediate filament interactions and causes dilated cardiomyopathy, woolly hair and keratoderma. *Hum. Mol. Genet.* 9, 2761–2766 (2000).
16. Uzumcu, A. *et al.* Loss of desmoplakin isoform I causes early onset cardiomyopathy and heart failure in a Naxos-like syndrome. *J. Med. Genet.* 43, e5 (2006).
17. Christensen, A. H. *et al.* Wide spectrum of desmosomal mutations in Danish patients with arrhythmogenic right ventricular cardiomyopathy. *J. Med. Genet.* 47, 736–744 (2010).
18. Krishnamurthy, S. *et al.* Arrhythmogenic dilated cardiomyopathy due to a novel mutation in the desmoplakin gene. *Indian J. Pediatr.* 78, 866–869 (2011).

19. Williams, T. *et al.* Novel desmoplakin mutation: juvenile biventricular cardiomyopathy with left ventricular non-compaction and acantholytic palmoplantar keratoderma. *Clin. Res. Cardiol. Off. J. Ger. Card. Soc.* 100, 1087–1093 (2011).
20. Rasmussen, T. B. *et al.* Protein expression studies of desmoplakin mutations in cardiomyopathy patients reveal different molecular disease mechanisms. *Clin. Genet.* 84, 20–30 (2013).
21. Yesudian, P. D. *et al.* Novel compound heterozygous mutations in the desmoplakin gene cause hair shaft abnormalities and culminate in lethal cardiomyopathy. *Clin. Exp. Dermatol.* 39, 506–508 (2014).
22. Pigors, M. *et al.* Desmoplakin mutations with palmoplantar keratoderma, woolly hair and cardiomyopathy. *Acta Derm. Venereol.* 95, 337–340 (2015).
23. Alcalai, R., Metzger, S., Rosenheck, S., Meiner, V. & Chajek-Shaul, T. A recessive mutation in desmoplakin causes arrhythmogenic right ventricular dysplasia, skin disorder, and woolly hair. *J. Am. Coll. Cardiol.* 42, 319–327 (2003).
24. Molho-Pessach, V. *et al.* Two Novel Homozygous Desmoplakin Mutations in Carvajal Syndrome. *Pediatr. Dermatol.* (2015).  
doi:10.1111/pde.12541
25. Asimaki, A. *et al.* Unique epidermolytic bullous dermatosis with associated lethal cardiomyopathy related to novel desmoplakin mutations. *J. Cutan. Pathol.* 36, 553–559 (2009).
26. Vahlquist, A. *et al.* A Scandinavian case of skin fragility, alopecia and cardiomyopathy caused by DSP mutations. *Clin. Exp. Dermatol.* 39, 30–34 (2014).
27. Antonov, N. K. *et al.* Early-onset heart failure, alopecia, and cutaneous abnormalities associated with a novel compound heterozygous mutation in desmoplakin. *Pediatr. Dermatol.* 32, 102–108 (2015).

28. Mahoney, M. G. *et al.* Compound heterozygous desmoplakin mutations result in a phenotype with a combination of myocardial, skin, hair, and enamel abnormalities. *J. Invest. Dermatol.* 130, 968–978 (2010).
29. Tanaka, A. *et al.* Novel truncating mutations in PKP1 and DSP cause similar skin phenotypes in two Brazilian families. *Br. J. Dermatol.* 160, 692–697 (2009).
30. Whittock, N. V. *et al.* Compound heterozygosity for non-sense and mis-sense mutations in desmoplakin underlies skin fragility/woolly hair syndrome. *J. Invest. Dermatol.* 118, 232–238 (2002).
31. Al-Owain, M. *et al.* Novel homozygous mutation in DSP causing skin fragility-woolly hair syndrome: report of a large family and review of the desmoplakin-related phenotypes. *Clin. Genet.* 80, 50–58 (2011).
32. Smith, F. J. D., Wilson, N. J., Moss, C., Dopping-Hepenstal, P. & McGrath, J. Compound heterozygous mutations in desmoplakin cause skin fragility and woolly hair. *Br. J. Dermatol.* 166, 894–896 (2012).
33. Jonkman, M. F. *et al.* Loss of desmoplakin tail causes lethal acantholytic epidermolysis bullosa. *Am. J. Hum. Genet.* 77, 653–660 (2005).
34. Bolling, M. C. *et al.* Lethal acantholytic epidermolysis bullosa due to a novel homozygous deletion in DSP: expanding the phenotype and implications for desmoplakin function in skin and heart. *Br. J. Dermatol.* 162, 1388–1394 (2010).
35. Hobbs, R. P. *et al.* Insights from a desmoplakin mutation identified in lethal acantholytic epidermolysis bullosa. *J. Invest. Dermatol.* 130, 2680–2683 (2010).
36. McGrath, J. A. *et al.* Skin fragility and hypohidrotic ectodermal dysplasia resulting from ablation of plakophilin 1. *Br. J. Dermatol.* 140, 297–307 (1999).

37. Sprecher, E. *et al.* Homozygous splice site mutations in PKP1 result in loss of epidermal plakophilin 1 expression and underlie ectodermal dysplasia/skin fragility syndrome in two consanguineous families. *J. Invest. Dermatol.* 122, 647–651 (2004).
38. Abdalla, E. M. & Has, C. A plakophilin-1 gene mutation in an Egyptian family with ectodermal dysplasia-skin fragility syndrome. *Mol. Syndromol.* 5, 304–306 (2014).
39. Ersoy-Evans, S. *et al.* Ectodermal dysplasia-skin fragility syndrome resulting from a new homozygous mutation, 888delC, in the desmosomal protein plakophilin 1. *J. Am. Acad. Dermatol.* 55, 157–161 (2006).
40. Boyce, A. E. *et al.* Ectodermal dysplasia-skin fragility syndrome due to a new homozygous internal deletion mutation in the PKP1 gene. *Australas. J. Dermatol.* 53, 61–65 (2012).
41. McGrath, J. A. *et al.* Mutations in the plakophilin 1 gene result in ectodermal dysplasia/skin fragility syndrome. *Nat. Genet.* 17, 240–244 (1997).
42. Zheng, R., Bu, D.-F. & Zhu, X.-J. Compound heterozygosity for new splice site mutations in the plakophilin 1 gene (PKP1) in a Chinese case of ectodermal dysplasia-skin fragility syndrome. *Acta Derm. Venereol.* 85, 394–399 (2005).
43. Whittock, N. V. *et al.* Genomic amplification of the human plakophilin 1 gene and detection of a new mutation in ectodermal dysplasia/skin fragility syndrome. *J. Invest. Dermatol.* 115, 368–374 (2000).
44. Hernández-Martín, A. *et al.* Ectodermal dysplasia-skin fragility syndrome: a novel mutation in the PKP1 gene. *Clin. Exp. Dermatol.* 38, 787–790 (2013).
45. Steijlen, P. M. *et al.* Cryptic splicing at a non-consensus splice-donor in a patient with a novel mutation in the plakophilin-1 gene. *J. Invest. Dermatol.* 122, 1321–1324 (2004).



46. Hamada, T. *et al.* Genotype-phenotype correlation in skin fragility-ectodermal dysplasia syndrome resulting from mutations in plakophilin 1. *Exp. Dermatol.* 11, 107–114 (2002).
47. Rickman, L. *et al.* N-terminal deletion in a desmosomal cadherin causes the autosomal dominant skin disease striate palmoplantar keratoderma. *Hum. Mol. Genet.* 8, 971–976 (1999).
48. Hunt, D. M. *et al.* Spectrum of dominant mutations in the desmosomal cadherin desmoglein 1, causing the skin disease striate palmoplantar keratoderma. *Eur. J. Hum. Genet. EJHG* 9, 197–203 (2001).
49. Keren, H., Bergman, R., Mizrachi, M., Kashi, Y. & Sprecher, E. Diffuse nonepidermolytic palmoplantar keratoderma caused by a recurrent nonsense mutation in DSG1. *Arch. Dermatol.* 141, 625–628 (2005).
50. Dua-Awereh, M. B., Shimomura, Y., Kraemer, L., Wajid, M. & Christiano, A. M. Mutations in the desmoglein 1 gene in five Pakistani families with striate palmoplantar keratoderma. *J. Dermatol. Sci.* 53, 192–197 (2009).
51. Milingou, M., Wood, P., Masouyé, I., McLean, W. H. & Borradori, L. Focal palmoplantar keratoderma caused by an autosomal dominant inherited mutation in the desmoglein 1 gene. *Dermatol. Basel Switz.* 212, 117–122 (2006).
52. Kljuic, A. *et al.* A nonsense mutation in the desmoglein 1 gene underlies striate keratoderma. *Exp. Dermatol.* 12, 523–527 (2003).
53. Zamiri, M. *et al.* Mutation in DSG1 causing autosomal dominant striate palmoplantar keratoderma. *Br. J. Dermatol.* 161, 692–694 (2009).
54. Hershkovitz, D., Lugassy, J., Indelman, M., Bergman, R. & Sprecher, E. Novel mutations in DSG1 causing striate palmoplantar keratoderma. *Clin. Exp. Dermatol.* 34, 224–228 (2009).
55. Barber, A. G., Wajid, M., Columbo, M., Lubetkin, J. & Christiano, A. M. Striate palmoplantar keratoderma resulting from a frameshift mutation in the desmoglein 1 gene. *J. Dermatol. Sci.* 45, 161–166 (2007).

56. Samuelov, L. *et al.* Desmoglein 1 deficiency results in severe dermatitis, multiple allergies and metabolic wasting. *Nat. Genet.* 45, 1244–1248 (2013).
57. Has, C. *et al.* Loss of desmoglein 1 associated with palmoplantar keratoderma, dermatitis and multiple allergies. *Br. J. Dermatol.* 172, 257–261 (2015).
58. Kljuic, A. *et al.* Desmoglein 4 in hair follicle differentiation and epidermal adhesion: evidence from inherited hypotrichosis and acquired pemphigus vulgaris. *Cell* 113, 249–260 (2003).
59. Rafiq, M. A. *et al.* A recurrent intragenic deletion mutation in DSG4 gene in three Pakistani families with autosomal recessive hypotrichosis. *J. Invest. Dermatol.* 123, 247–248 (2004).
60. John, P. *et al.* Recurrent intragenic deletion mutation in desmoglein 4 gene underlies autosomal recessive hypotrichosis in two Pakistani families of Balochi and Sindhi origins. *Arch. Dermatol. Res.* 298, 135–137 (2006).
61. Messenger, A. G., Bazzi, H., Parslew, R., Shapiro, L. & Christiano, A. M. A missense mutation in the cadherin interaction site of the desmoglein 4 gene underlies localized autosomal recessive hypotrichosis. *J. Invest. Dermatol.* 125, 1077–1079 (2005).
62. Wajid, M. *et al.* Localized autosomal recessive hypotrichosis due to a frameshift mutation in the desmoglein 4 gene exhibits extensive phenotypic variability within a Pakistani family. *J. Invest. Dermatol.* 127, 1779–1782 (2007).
63. Shimomura, Y., Sakamoto, F., Kariya, N., Matsunaga, K. & Ito, M. Mutations in the desmoglein 4 gene are associated with monilethrix-like congenital hypotrichosis. *J. Invest. Dermatol.* 126, 1281–1285 (2006).
64. Zlotogorski, A. *et al.* An autosomal recessive form of monilethrix is caused by mutations in DSG4: clinical overlap with localized autosomal recessive hypotrichosis. *J. Invest. Dermatol.* 126, 1292–1296 (2006).

65. Schaffer, J. V. *et al.* Mutations in the desmoglein 4 gene underlie localized autosomal recessive hypotrichosis with monilethrix hairs and congenital scalp erosions. *J. Invest. Dermatol.* 126, 1286–1291 (2006).
66. Farooq, M., Ito, M., Naito, M. & Shimomura, Y. A case of monilethrix caused by novel compound heterozygous mutations in the desmoglein 4 (DSG4) gene. *Br. J. Dermatol.* 165, 425–431 (2011).
67. Kato, M. *et al.* An Autosomal Recessive Mutation of DSG4 Causes Monilethrix through the ER Stress Response. *J. Invest. Dermatol.* (2015). doi:10.1038/jid.2015.12
68. Simpson, M. A. *et al.* Homozygous mutation of desmocollin-2 in arrhythmogenic right ventricular cardiomyopathy with mild palmoplantar keratoderma and woolly hair. *Cardiology* 113, 28–34 (2009).
69. Ayub, M. *et al.* A homozygous nonsense mutation in the human desmocollin-3 (DSC3) gene underlies hereditary hypotrichosis and recurrent skin vesicles. *Am. J. Hum. Genet.* 85, 515–520 (2009).
70. Levy-Nissenbaum, E. *et al.* Hypotrichosis simplex of the scalp is associated with nonsense mutations in CDSN encoding corneodesmosin. *Nat. Genet.* 34, 151–153 (2003).
71. Dávalos, N. O. *et al.* A non-sense mutation in the corneodesmosin gene in a Mexican family with hypotrichosis simplex of the scalp. *Br. J. Dermatol.* 153, 1216–1219 (2005).
72. Huang, X., Jiang, H. & Quan, Q. [Clinical investigation of a Chinese family with hypotrichosis simplex of the scalp and mutational analysis of CDSN gene]. *Zhonghua Yi Xue Yi Chuan Xue Za Zhi Zhonghua Yixue Yichuanxue Zazhi Chin. J. Med. Genet.* 29, 452–454 (2012).
73. Telem, D. F., Israeli, S., Sarig, O. & Sprecher, E. Inflammatory peeling skin syndrome caused a novel mutation in CDSN. *Arch. Dermatol. Res.* 304, 251–255 (2012).

74. Oji, V. *et al.* Loss of corneodesmosin leads to severe skin barrier defect, pruritus, and atopy: unraveling the peeling skin disease. *Am. J. Hum. Genet.* 87, 274–281 (2010).
75. Mallet, A. *et al.* Identification of the first nonsense CDSN mutation with expression of a truncated protein causing peeling skin syndrome type B. *Br. J. Dermatol.* 169, 1322–1325 (2013).
76. Israeli, S., Zamir, H., Sarig, O., Bergman, R. & Sprecher, E. Inflammatory peeling skin syndrome caused by a mutation in CDSN encoding corneodesmosin. *J. Invest. Dermatol.* 131, 779–781 (2011).
77. Ishida-Yamamoto, A. *et al.* Inflammatory peeling skin syndrome caused by homozygous genomic deletion in the PSORS1 region encompassing the CDSN gene. *Exp. Dermatol.* 23, 60–63 (2014).
78. Teye, K. *et al.* Homozygous deletion of six genes including corneodesmosin on chromosome 6p21.3 is associated with generalized peeling skin disease. *J. Dermatol. Sci.* 75, 36–42 (2014).
